# Supplementary material for: Nestin Protein Is Phosphorylated in Adult Neural Stem/Progenitor Cells and Not Endothelial Progenitor Cells
Source: Stem Cells Int. 2012 Sep 13;2012:430138. doi: 10.1155/2012/430138 (PMC3458297; doi:10.1155/2012/430138)
Supplement: Supplementary file 1 — Figure 1 in Supplementary Material: A list of phosphorylated sites of proteins identified in CNS stem/progenitor cells, EPCs, and neoplastic ECs. "1" in the list means that the phosphopeptide has been identified. [file 430138.f1.xls]

## Sheet: Figure 1
AccNum	Phosphorylated sites	Neurospheres	EPCs #1	EPCs #2	Neoplastic ECs		AccNum	Phosphorylated sites	Neurospheres	EPCs #1	EPCs #2	Neoplastic ECs		AccNum	Phosphorylated sites	Neurospheres	EPCs #1	EPCs #2	Neoplastic ECs		AccNum	Phosphorylated sites	Neurospheres	EPCs #1	EPCs #2	Neoplastic ECs		AccNum	Phosphorylated sites	Neurospheres	EPCs #1	EPCs #2	Neoplastic ECs		AccNum	Phosphorylated sites	Neurospheres	EPCs #1	EPCs #2	Neoplastic ECs		AccNum	Phosphorylated sites	Neurospheres	EPCs #1	EPCs #2	Neoplastic ECs		AccNum
1433E_MOUSE	S210			1	1		AT133_MOUSE	S813			1	1		CHERP_MOUSE	S824				1		DNJC5_MOUSE	S12			1			GCF_MOUSE	T86				1		KAP3_MOUSE	S112		1	1	1		MAP2_MOUSE	S1788	1					NEST_MOUSE
1433Z_MOUSE	S207			1	1		AT2A2_MOUSE	S661				1		CHERP_MOUSE	S826				1		DNJC5_MOUSE	S15			1			GCH1_MOUSE	S51				1		KAP3_MOUSE	Y118				1		MAP2_MOUSE	S1791	1					NEST_MOUSE
3BP1_MOUSE	T455	1					AT2A2_MOUSE	S663			1			CHERP_MOUSE	T828				1		DNLI1_MOUSE	S51				1		GCP2_MOUSE	T594			1			KAPCA_CRIGR	T??			1			MAP2_MOUSE	T1609	1					NEST_MOUSE
AAK1_MOUSE	T604				1		AT2B2_MOUSE	S1189	1					CHIP_MOUSE	S20	1			1		DNLI1_MOUSE	T193				1		GFPT1_MOUSE	S259	1		1			KAPCB_CRIGR	T??		1				MAP2_MOUSE	T1650	1					NEST_MOUSE
AAK1_MOUSE	T618	1					ATAT_MOUSE	S238	1					CHIP_MOUSE	S24				1		DNMT1_MOUSE	S142				1		GIT1_MOUSE	S371				1		KCC2B_MOUSE	T287	1					MAP2_MOUSE	T1781	1					NEST_MOUSE
AAKB1_MOUSE	S108			1	1		ATAT_MOUSE	Y235	1					CHP1_MOUSE	T7		1	1			DOCK1_MOUSE	T566	1					GIT1_MOUSE	S601				1		KCC2D_MOUSE	S490				1		MAP4_MOUSE	S1046	1					NEST_MOUSE
AAKB2_MOUSE	S107			1			ATG2B_MOUSE	S1015				1		CHSP1_MOUSE	S31			1	1		DOCK1_MOUSE	Y567	1					GIT1_MOUSE	S605				1		KCC2D_MOUSE	S494				1		MAP4_MOUSE	S475				1		NEST_MOUSE
AASD1_MOUSE	S409				1		ATG2B_MOUSE	S1017				1		CHSP1_MOUSE	S33			1	1		DOCK4_MOUSE	S1824				1		GIT1_MOUSE	T610				1		KDM5C_MOUSE	S317			1			MAP4_MOUSE	S506				1		NEST_MOUSE
AATF_MOUSE	S283				1		ATP7A_MOUSE	S357				1		CHSP1_MOUSE	S42		1	1	1		DOCK7_MOUSE	S1422	1					GIT2_MOUSE	S535				1		KGP1_MOUSE	T521			1			MAP4_MOUSE	S598				1		NEST_MOUSE
AATF_MOUSE	S287				1		ATRX_MOUSE	S1335				1		CHSP1_MOUSE	S53	1	1		1		DOCK7_MOUSE	S929	1					GNL1_RAT	S??				1		KIF1A_MOUSE	S1375		1	1			MAP4_MOUSE	S667				1		NEST_MOUSE
AATF_MOUSE	S288				1		ATRX_MOUSE	S1339				1		CI078_MOUSE	S261				1		DOK1_MOUSE	S50			1			GNL3_MOUSE	S505				1		KIF1A_MOUSE	S1533	1					MAP4_MOUSE	S760	1			1		NEST_MOUSE
ABCA1_MOUSE	S1296				1		ATRX_MOUSE	S590				1		CIP4_MOUSE	S296				1		DOK3_MOUSE	S274			1			GOGA5_MOUSE	S116				1		KIF1A_MOUSE	S1537	1					MARCS_MOUSE	S152	1					NEST_MOUSE
ABCF1_MOUSE	S107				1		ATRX_MOUSE	S717				1		CIP4_MOUSE	S299				1		DOP1_MOUSE	S1856	1					GP124_MOUSE	S1104				1		KIF24_MOUSE	S607			1			MARCS_MOUSE	S171	1					NEUM_MOUSE
ABCF1_MOUSE	S138	1			1		ATRX_MOUSE	S719				1		CJ078_MOUSE	S??	1			1		DPOD3_MOUSE	S306	1			1		GPAT3_MOUSE	T283	1					KIF24_MOUSE	T615			1			MARCS_MOUSE	S27	1			1		NFE2_MOUSE
ABCF1_MOUSE	S194	1					ATRX_MOUSE	S92				1		CK096_MOUSE	T218	1					DPYL3_MOUSE	S522				1		GPN1_MOUSE	S338				1		KIF24_MOUSE	T620			1			MARK2_MOUSE	S483				1		NFIC_MOUSE
ABI2_MOUSE	S190	1					ATX2L_MOUSE	S109			1			CKAP4_MOUSE	S367		1				DPYL3_MOUSE	T519	1					GPR56_MOUSE	S681				1		KIFA3_MOUSE	S60			1			MATR3_MOUSE	S188	1		1	1		NHRF1_MOUSE
ABL2_MOUSE	S632				1		ATX2L_MOUSE	S337	1			1		CLAP1_MOUSE	S600	1					DREB_MOUSE	S142	1			1		GPSM1_MOUSE	S490			1	1		KKCC2_MOUSE	S495		1	1			MATR3_MOUSE	S195				1		NHRF1_MOUSE
ABLM1_MOUSE	S479	1					ATX2L_MOUSE	S597				1		CLAP2_MOUSE	S376	1					DREB_MOUSE	S385		1				GPTC4_MOUSE	S130				1		KLC2_MOUSE	S574				1		MBB1A_MOUSE	S1253				1		NHRF1_MOUSE
ABLM1_MOUSE	S496	1					BA2L2_MOUSE	S??	1			1		CLAP2_MOUSE	S529				1		DREB_MOUSE	S387			1	1		GRDN_MOUSE	S1680				1		KLC2_MOUSE	S575				1		MBB1A_MOUSE	S1280				1		NHRF3_MOUSE
ABLM1_MOUSE	S671				1		BAD_MOUSE	S136			1	1		CLAP2_MOUSE	S535				1		DSRAD_MOUSE	S1059		1				GRLF1_MOUSE	S??				1		KPCB_MOUSE	T500			1			MBOA2_MOUSE	S472	1					NHRF3_MOUSE
ABLM1_MOUSE	S738	1					BAT2_MOUSE	S??				1		CLCC1_MOUSE	S429	1					DTD1_MOUSE	S197	1					GRLF1_MOUSE	Y??				1		KPCD2_MOUSE	S197				1		MCLN1_MOUSE	S547		1				NHRF3_MOUSE
ACACA_MOUSE	S29				1		BAZ1A_MOUSE	T732				1		CLCC1_MOUSE	S58			1			DYHC1_MOUSE	S4366			1	1		GSK3B_MOUSE	Y216	1	1	1	1		KPCD2_MOUSE	S198				1		MCM2_MOUSE	S139				1		NHSL1_MOUSE
ACBG2_MOUSE	T173			1			BAZ1B_MOUSE	S1338	1	1		1		CLH_MOUSE	T394			1			DYHC1_MOUSE	T4367				1		GTPB1_MOUSE	S24				1		KPCD2_MOUSE	S211				1		MCM2_MOUSE	S140				1		NHSL1_MOUSE
ACE_MOUSE	S1305	1		1	1		BCKD_MOUSE	S31		1				CLIP2_MOUSE	S353			1			DYR1B_MOUSE	Y273	1	1		1		GTPB1_MOUSE	S44				1		KPCD2_MOUSE	S214				1		MCM2_MOUSE	S21				1		NHSL2_MOUSE
ACINU_MOUSE	S1003	1					BCKD_MOUSE	T32	1	1				CLK3_MOUSE	S157				1		DYST_MOUSE	S3889		1				GTPB1_MOUSE	S47				1		KPCD_MOUSE	S643			1			MCM2_MOUSE	S26				1		NHSL2_MOUSE
ACINU_MOUSE	S216				1		BCLF1_MOUSE	S177	1			1		CLN3_MOUSE	S14		1				DYST_MOUSE	S4675				1		H15_MOUSE	S18	1					KPCD_MOUSE	S645		1		1		MCM2_MOUSE	S27				1		NIBAN_MOUSE
ACINU_MOUSE	S479	1					BCLF1_MOUSE	S263				1		CLPX_MOUSE	S97				1		DYST_MOUSE	S5402		1				H4_MOUSE	S48		1	1			KPCD_MOUSE	T505			1			MCM3_MOUSE	S668				1		NISCH_MOUSE
ACINU_MOUSE	S710				1		BCLF1_MOUSE	S289				1		CML1_MOUSE	S347			1			E41L1_MOUSE	S782	1					HACD3_MOUSE	S114		1	1	1		KPCL_MOUSE	S678				1		MCM3_MOUSE	S672	1			1		NOP56_MOUSE
ACLY_MOUSE	S455	1					BCLF1_MOUSE	S383				1		CML1_MOUSE	S350			1			E41L2_MOUSE	S38				1		HAP28_MOUSE	S60	1			1		KS6A3_MOUSE	S415		1	1			MCRS1_MOUSE	S282				1		NOP56_MOUSE
ACTN2_MOUSE	S147		1				BCLF1_MOUSE	S395	1			1		CMYA5_MOUSE	T3167	1					EAF1_MOUSE	S165				1		HAP28_MOUSE	S63	1			1		KS6A3_MOUSE	S715				1		MDC1_MOUSE	S168				1		NOP56_MOUSE
ACVL1_MOUSE	S159				1		BCLF1_MOUSE	S529				1		CNN3_MOUSE	Y268	1					EAP1_RAT	S??				1		HDAC1_MOUSE	S421	1			1		KS6A4_MOUSE	S343			1	1		MED1_MOUSE	S1481				1		NOP56_MOUSE
ADA17_MOUSE	S794	1					BCLF1_MOUSE	S656	1					CO059_MOUSE	T267	1					EAPP_MOUSE	S109				1		HDAC1_MOUSE	S423	1			1		KS6A4_MOUSE	S347			1	1		MED1_MOUSE	S1484				1		NOP56_MOUSE
ADCY4_MOUSE	T533				1		BCR_MOUSE	S461				1		COBL1_MOUSE	S1215	1					EAPP_MOUSE	S111				1		HDAC2_MOUSE	S422	1			1		KS6C1_MOUSE	S423			1			MED24_MOUSE	S860				1		NOP56_MOUSE
ADCY7_MOUSE	T367		1				BICD2_MOUSE	S578	1			1		COBL1_MOUSE	S313	1					EF1B_MOUSE	S106	1		1	1		HDAC2_MOUSE	S424	1			1		KS6C1_MOUSE	S426			1			MED24_MOUSE	S871				1		NOP58_MOUSE
ADDA_MOUSE	T610				1		BIEA_MOUSE	S229		1	1			COBL1_MOUSE	S551				1		EF1D_MOUSE	S162	1	1	1	1		HDAC5_MOUSE	S269	1					KTN1_MOUSE	S75				1		MEI4L_MOUSE	S??	1					NOP58_MOUSE
ADDG_RAT	S??				1		BNI3L_MOUSE	S119	1					COBL1_MOUSE	S896	1			1		EF1D_MOUSE	T147				1		HDAC5_MOUSE	S270	1					L2GL1_MOUSE	S986				1		MELK_MOUSE	S521				1		NOP58_MOUSE
AFAD_MOUSE	S1182				1		BNIP2_MOUSE	S114	1					COBL1_MOUSE	S897				1		EF2_CRIGR	T??	1			1		HDGF_MOUSE	S132	1			1		LAP2B_MOUSE	S158				1		MENTO_MOUSE	S39		1				NOS3_RAT
AFAD_MOUSE	S1499				1		BNIP3_MOUSE	S88	1					COBL1_MOUSE	S993				1		EF2_MOUSE	T57	1					HDGF_MOUSE	S133	1			1		LAP2B_MOUSE	T159				1		MERTK_RAT	S??				1		NOS3_RAT
AFAD_MOUSE	S1795				1		BOP1_MOUSE	S112				1		COBL1_MOUSE	T298				1		EHD2_MOUSE	S438			1	1		HDGF_MOUSE	S165	1			1		LAP2_RAT	S??				1		MFAP1_MOUSE	S116				1		NP1L4_MOUSE
AFAD_RAT	S??			1	1		BOP1_MOUSE	S113				1		COBL1_MOUSE	T550				1		EHD2_MOUSE	S468				1		HDGR2_MOUSE	S366	1			1		LAP2_RAT	T??	1			1		MFAP1_MOUSE	S118				1		NPL_MOUSE
AFAP1_MOUSE	S669				1		BORG5_MOUSE	S207				1		COBL_MOUSE	S272				1		EHD2_MOUSE	S470				1		HDGR2_MOUSE	S367	1			1		LAR4B_MOUSE	S500	1					MFAP1_MOUSE	S132				1		NPM3_MOUSE
AGM1_MOUSE	S64			1			BRAF_MOUSE	S135	1					COCA1_MOUSE	S185				1		EHD4_MOUSE	S459				1		HDGR2_MOUSE	S450	1					LARP1_MOUSE	S604				1		MFAP1_MOUSE	S133				1		NPM3_MOUSE
AKA12_MOUSE	S270				1		BRAF_MOUSE	S484			1	1		COCA1_MOUSE	T177				1		EI2BA_MOUSE	S105	1					HECAM_MOUSE	S379	1					LARP1_MOUSE	S608				1		MFAP1_MOUSE	T267	1			1		NPM3_MOUSE
AKA12_MOUSE	S273				1		BRCA2_RAT	S??				1		COMT_MOUSE	S261				1		EI2BE_MOUSE	S540	1	1		1		HECAM_MOUSE	S385	1					LARP1_MOUSE	S81	1			1		MINK1_MOUSE	S746				1		NPM_MOUSE
AKA12_MOUSE	S371				1		BRCA2_RAT	T??				1		CPNE4_MOUSE	S213	1					EIF3B_MOUSE	S120				1		HGNAT_MOUSE	S238		1				LARP7_MOUSE	S334				1		MK01_MOUSE	T183	1					NSF1C_MOUSE
AKA12_MOUSE	S489				1		BRE1A_MOUSE	S138			1	1		CPSF2_MOUSE	S419				1		EIF3B_MOUSE	S123				1		HMGA1_MOUSE	S102	1					LARP7_MOUSE	T335				1		MK01_MOUSE	Y185	1		1			NSF1C_MOUSE
AKA12_MOUSE	S584		1		1		BUD13_MOUSE	S148				1		CPSF2_MOUSE	S420				1		EIF3B_MOUSE	S75				1		HMGA1_MOUSE	S103	1					LAT4_MOUSE	S297			1			ML12B_RAT	S??			1			NSF1C_MOUSE
AKA12_MOUSE	S613	1	1		1		BUD13_MOUSE	S200				1		CPSF2_MOUSE	S423				1		EIF3B_MOUSE	S79				1		HN1_MOUSE	S87	1					LATS1_MOUSE	S463				1		MLF2_MOUSE	S237				1		NSUN2_MOUSE
AKA12_MOUSE	S615		1		1		BUD13_MOUSE	S226				1		CRK_MOUSE	S41		1		1		EIF3C_RAT	S??				1		HNRH1_MOUSE	T100				1		LATS1_MOUSE	S612				1		MPP10_MOUSE	S164				1		NU155_MOUSE
AKA12_MOUSE	S631				1		BUD13_MOUSE	T144				1		CRTC3_MOUSE	S329				1		ELL_MOUSE	S299				1		HNRH1_MOUSE	T107				1		LEO1_MOUSE	S295				1		MPP10_MOUSE	S168				1		NUCB1_MOUSE
AKA12_MOUSE	S767				1		BUD13_MOUSE	T196				1		CRYAB_MESAU	S??			1			EPHA2_MOUSE	S898			1	1		HNRH2_MOUSE	S104	1					LEO1_MOUSE	S297				1		MPP10_MOUSE	S172				1		NUCB1_MOUSE
AKA12_MOUSE	T272				1		BUD13_MOUSE	T222				1		CSRP1_MOUSE	S192	1			1		EPHA2_MOUSE	S902				1		HNRPK_MOUSE	S284				1		LIMA1_MOUSE	S488	1					MPRIP_RAT	S??		1	1	1		NUCB1_MOUSE
AKA12_MOUSE	T632				1		BYST_MOUSE	S97				1		CT2NL_MOUSE	S481				1		EPN3_MOUSE	S251	1					HNRPU_MOUSE	S247		1				LIMA1_MOUSE	S735		1				MPRI_MOUSE	S2401	1					NUCB1_MOUSE
AKAP1_MOUSE	S101				1		C163A_MOUSE	S14	1					CT2NL_MOUSE	S488				1		EPS15_MOUSE	S324			1	1		HS105_MOUSE	S810	1			1		LIPB1_MOUSE	S753			1	1		MPRI_MOUSE	S2476	1					NUCB2_MOUSE
AKAP2_MOUSE	S740			1	1		C2C2L_MOUSE	S660	1					CTNA1_MOUSE	S641	1	1	1	1		ERC6L_MOUSE	S1021				1		HS12B_MOUSE	S25				1		LIPB1_MOUSE	S957				1		MRCKB_MOUSE	S1692				1		NUCKS_MOUSE
AKAP2_RAT	T??				1		C5AR_MOUSE	S321		1				CTNA1_MOUSE	S652				1		ESYT2_MOUSE	S682				1		HS12B_MOUSE	S29				1		LMNA_MOUSE	S22	1			1		MRCKB_MOUSE	S1695	1			1		NUCKS_RAT
AKAP8_MOUSE	S320		1				C5AR_MOUSE	S324		1				CTNA1_MOUSE	S655				1		ESYT2_MOUSE	S685				1		HS12B_MOUSE	S44				1		LMNA_MOUSE	S301			1			MRP1_MOUSE	S290	1	1	1	1		NUCKS_RAT
AKTS1_MOUSE	S203	1			1		C5AR_MOUSE	S329		1				CTNA1_MOUSE	T654				1		EVI1_MOUSE	S845				1		HS12B_MOUSE	S46				1		LMNA_MOUSE	S390		1	1	1		MRP1_MOUSE	S918				1		NUCL_MESAU
AKTS1_MOUSE	S204	1			1		CA055_MOUSE	S269				1		CTNA1_MOUSE	T658	1			1		EVI1_MOUSE	S851				1		HS12B_MOUSE	T42				1		LMNA_MOUSE	S395		1	1	1		MRP_MOUSE	S93	1					NUDC_MOUSE
AKTS1_MOUSE	S212				1		CALX_MOUSE	S553	1	1		1		CTNB1_MOUSE	S552			1			EZRI_MOUSE	S535	1					HS90A_MOUSE	S231	1	1		1		LMNA_MOUSE	S573				1		MTA1_MOUSE	S576				1		NUFP2_MOUSE
AKTS1_MOUSE	S213	1			1		CALX_MOUSE	S563	1	1		1		CTNB1_MOUSE	T556			1	1		F117A_MOUSE	S213				1		HS90A_MOUSE	S252			1	1		LRC8A_MOUSE	S217		1				MTMRA_MOUSE	S603	1			1		NUFP2_MOUSE
AKTS1_MOUSE	T247	1					CALX_MOUSE	S569	1					CTND1_MOUSE	S268	1					F122A_RAT	S??				1		HS90A_MOUSE	S263	1	1	1	1		LRRF1_MOUSE	S649				1		MTR1_MOUSE	S28				1		NUFP2_MOUSE
ALDOA_MOUSE	S36		1	1			CALX_MOUSE	S582	1			1		CTND1_MOUSE	S269	1					F134C_MOUSE	S256				1		HS90B_MOUSE	S226		1				LRRF1_RAT	S??		1				MTR1_MOUSE	S30				1		NUP98_RAT
ALDOA_MOUSE	S39		1	1			CAMP2_MOUSE	S439	1					CTND1_MOUSE	S349	1			1		F134C_MOUSE	S258				1		HS90B_MOUSE	S255	1	1	1	1		LRRF2_MOUSE	S116				1		MTSSL_MOUSE	S419	1					ODBA_MOUSE
ALDOA_MOUSE	S46		1		1		CAPG_MOUSE	S341		1				CTND1_MOUSE	S864			1			F134C_MOUSE	S26				1		HSP74_MOUSE	S76			1			LRRF2_MOUSE	T114			1	1		MXRA7_MOUSE	S79	1					ODPA_MOUSE
ALDOA_MOUSE	T37		1				CASC3_MOUSE	S263				1		CTND1_MOUSE	Y865			1			F134C_MOUSE	S260				1		HSPB1_CRILO	S??	1	1	1			LS14A_MOUSE	S183	1			1		MY18A_MOUSE	S1966				1		ODPA_RAT
ALKB2_MOUSE	S160	1					CAV2_MOUSE	S20				1		CXA1_MOUSE	S306			1			F179B_MOUSE	S224	1					HUWE1_MOUSE	S1907		1	1	1		LS14A_MOUSE	S216	1					MY18A_MOUSE	S1970				1		OSBL3_MOUSE
ALKB2_MOUSE	S166	1					CAV2_MOUSE	S23				1		CXAR_MOUSE	S332	1					F195B_MOUSE	S21	1			1		HXD10_MOUSE	S238				1		LSR_MOUSE	S588	1					MYCT1_MOUSE	S101				1		OSBP1_MOUSE
AMRP_MOUSE	S53		1				CAV2_MOUSE	Y19				1		CYTSA_MOUSE	S385			1			FA40A_MOUSE	S335			1	1		HXD10_MOUSE	S239				1		LUZP1_MOUSE	S660				1		MYCT1_MOUSE	S59				1		OSBP1_MOUSE
ANLN_MOUSE	S180				1		CB078_MOUSE	S551	1					CYTSA_MOUSE	S386			1	1		FA40B_MOUSE	S364	1					HYCCI_MOUSE	S453			1			LYRIC_MOUSE	S423	1					MYCT1_MOUSE	S87				1		OSBP1_MOUSE
ANLN_MOUSE	S293				1		CBX3_MOUSE	S176				1		DAB2P_MOUSE	S702				1		FA53B_MOUSE	S168	1					IF2B2_MOUSE	S161				1		M3K2_MOUSE	S239			1			MYCT1_MOUSE	S93				1		OSTF1_MOUSE
ANLN_MOUSE	T299				1		CBX5_MOUSE	S93	1			1		DAB2_MOUSE	S32		1				FA65A_MOUSE	S22				1		IF2B2_MOUSE	S162			1	1		M3K3_MOUSE	S337				1		MYH10_MOUSE	S1952	1					OSTP_MOUSE
ANR17_MOUSE	S2040				1		CC132_MOUSE	S559				1		DAB2_MOUSE	S394				1		FA65A_MOUSE	S347				1		IF2B2_MOUSE	S164			1			M3K3_MOUSE	S340				1		MYH10_MOUSE	S1956	1			1		OTUD4_MOUSE
ANR17_MOUSE	S2043				1		CC132_MOUSE	S561			1	1		DAB2_MOUSE	S401				1		FA65B_MOUSE	S44			1			IF2B_MOUSE	S67				1		M3K4_MOUSE	S1263				1		MYH9_MOUSE	S1714		1	1			OTUD4_MOUSE
ANTR1_MOUSE	S561	1					CCD12_MOUSE	S165				1		DAP1_MOUSE	S49	1					FBP1L_MOUSE	S488				1		IF2P_MOUSE	S137	1			1		M4A6D_MOUSE	S235				1		MYH9_MOUSE	S1943	1	1		1		OXR1_MOUSE
ANXA2_MOUSE	Y318		1				CCD86_RAT	S??		1				DBPA_MOUSE	S328				1		FBP1L_MOUSE	S489				1		IF2P_MOUSE	S139	1					M4K4_MOUSE	S621	1			1		MYO1C_MOUSE	S408		1				P210L_MOUSE
ANXA5_MOUSE	Y92		1				CCD86_RAT	T??		1				DC1L1_MOUSE	S207	1			1		FCSD2_MOUSE	S683				1		IF2P_MOUSE	S215	1	1		1		M4K4_MOUSE	S848			1			MYO1E_RAT	S??				1		P210L_MOUSE
AP3B1_MOUSE	S276	1	1	1			CCD94_MOUSE	S211				1		DC1L1_MOUSE	S516				1		FGD5_MOUSE	S619				1		IF4B_MOUSE	S406	1			1		MA7D1_MOUSE	S118		1				MYO1H_MOUSE	S537	1					P4K2A_MOUSE
AP3D1_MOUSE	S754				1		CCD94_MOUSE	S213				1		DC1L1_MOUSE	T515				1		FGD5_MOUSE	S625				1		IF4B_MOUSE	S445				1		MA7D1_MOUSE	S127				1		MYO5A_MOUSE	S1650			1			P4K2A_MOUSE
AP3D1_MOUSE	S755	1			1		CCNL1_MOUSE	S358				1		DC1L2_MOUSE	S194		1	1	1		FGD5_MOUSE	S626				1		IF4B_MOUSE	S459				1		MA7D1_MOUSE	S401	1			1		MYO5A_RAT	T??				1		P5I11_MOUSE
AP3D1_MOUSE	S760	1			1		CCNY_MOUSE	S326			1	1		DCLK1_MOUSE	S330	1					FHL2_MOUSE	S238		1				IF4G3_MOUSE	S267				1		MA7D1_MOUSE	T120		1				MYO9B_MOUSE	S1264	1			1		P66A_MOUSE
AP3D1_MOUSE	S784				1		CCR1_MOUSE	S352		1				DCLK1_MOUSE	S332	1					FHOD1_MOUSE	S370				1		IL16_MOUSE	S1233	1					MACF1_MOUSE	S3889	1	1	1			MYOF_MOUSE	S174		1		1		P66A_MOUSE
AP3D1_MOUSE	T758				1		CD003_MOUSE	S19		1				DCLK1_MOUSE	S334	1					FIL1L_MOUSE	S789				1		IL16_MOUSE	S1239	1					MACF1_MOUSE	S4483				1		MYPC3_RAT	S??		1				P66A_MOUSE
AP3M2_MOUSE	S285	1					CDK11_MOUSE	S741				1		DCLK1_MOUSE	S337	1					FINC_MOUSE	S2475			1			IMA2_MOUSE	S62				1		MACF1_MOUSE	S5097	1					MYPT1_MOUSE	S445			1			P66B_MOUSE
AP3M2_MOUSE	S286	1					CDK11_MOUSE	T740				1		DCLK1_MOUSE	T311	1					FIP1_MOUSE	S479			1	1		IMA3_MOUSE	S60				1		MACF1_MOUSE	S5551				1		NAF1_MOUSE	S308				1		P66B_MOUSE
AP3M2_MOUSE	S287	1					CDK12_MOUSE	S1079				1		DCLK1_MOUSE	T336	1					FIP1_MOUSE	S483			1			INCE_MOUSE	S211				1		MAGI1_MOUSE	S1216	1					NAV1_MOUSE	S93				1		P66B_MOUSE
AP3M2_MOUSE	T294	1					CDK12_MOUSE	S677				1		DCLK2_MOUSE	S361	1					FIP1_MOUSE	S487				1		INCE_MOUSE	S218				1		MAP1B_MOUSE	S1251				1		NCBP1_MOUSE	S22		1	1	1		PA24A_MOUSE
AP3M2_MOUSE	T300	1					CDK12_MOUSE	S681				1		DDX20_MOUSE	S679				1		FIP1_MOUSE	T481				1		INT1_MOUSE	S1320				1		MAP1B_MOUSE	S1255				1		NCK1_MOUSE	T??	1					PA24A_MOUSE
APC4_MOUSE	S777				1		CDK13_MOUSE	S579	1					DDX20_MOUSE	Y674				1		FKB15_MOUSE	S1159	1					INT1_MOUSE	S1329				1		MAP1B_MOUSE	S1257				1		NCOA5_MOUSE	S378				1		PACS1_MOUSE
APC4_MOUSE	S779				1		CDK13_MOUSE	T580	1					DDX21_MOUSE	S118				1		FLNA_MOUSE	S1084				1		IPP2_MOUSE	S122	1			1		MAP1B_MOUSE	S1260				1		NCOR2_MOUSE	S149				1		PACS1_MOUSE
APLF_MOUSE	S245	1					CDK17_MOUSE	S146		1		1		DDX21_MOUSE	S155				1		FLNA_MOUSE	S1459			1	1		IPP2_MOUSE	S123	1	1		1		MAP1B_MOUSE	S1293				1		NCOR2_MOUSE	S152				1		PAIRB_MOUSE
APLF_MOUSE	S247	1					CDK17_MOUSE	S180				1		DDX21_MOUSE	S192				1		FLNA_MOUSE	S2152	1		1	1		ITPR1_MOUSE	S1588	1					MAP1B_MOUSE	S1307				1		NDRG2_MOUSE	S328	1					PAK2_MOUSE
ARF1_MOUSE	S147		1				CDK2_CRIGR	Y??	1			1		DDX41_MOUSE	Y33				1		FLNA_MOUSE	S2180			1			ITPR2_MOUSE	S1711		1				MAP1B_MOUSE	S1317				1		NDRG2_MOUSE	S338	1					PALLD_MOUSE
ARF4_MOUSE	S147		1				CDK2_MOUSE	T14	1			1		DDX55_MOUSE	S544				1		FLNA_MOUSE	S968			1			ITSN2_MOUSE	S838				1		MAP1B_MOUSE	S1325				1		NDRG2_MOUSE	T330	1					PALLD_MOUSE
ARH40_MOUSE	S959				1		CDK2_MOUSE	Y15	1			1		DGAT1_MOUSE	S10				1		FLNC_MOUSE	S2234	1	1	1			ITSN2_MOUSE	S843				1		MAP1B_MOUSE	S1391				1		NED4L_MOUSE	S504				1		PALLD_MOUSE
ARHG2_MOUSE	S646		1	1	1		CDS2_MOUSE	S20	1					DGKQ_MOUSE	S22				1		FMNL2_MOUSE	S171	1					IWS1_MOUSE	S343				1		MAP1B_MOUSE	S1395				1		NED4L_MOUSE	S508				1		PALLD_MOUSE
ARHG2_MOUSE	S955				1		CDYL_MOUSE	S196				1		DGKQ_MOUSE	S26				1		FMNL3_MOUSE	T612			1			IWS1_MOUSE	S345				1		MAP1B_MOUSE	S1422	1					NED4L_MOUSE	S512				1		PALLD_MOUSE
ARHG2_MOUSE	S959				1		CE170_MOUSE	S1102				1		DI3L2_MOUSE	S864				1		FNBP2_MOUSE	S993				1		JAK2_MOUSE	S523			1			MAP1B_MOUSE	S1438	1			1		NED4L_MOUSE	S516				1		PALLD_MOUSE
ARHG6_MOUSE	S487			1			CELR2_MOUSE	S147		1				DKC1_MOUSE	S451				1		FNBP2_MOUSE	S994				1		JAM1_MOUSE	S285				1		MAP1B_MOUSE	S1775				1		NEDD4_MOUSE	S309	1	1		1		PAR11_MOUSE
ARHG6_MOUSE	S639	1					CENPC_MOUSE	S699				1		DKC1_MOUSE	S453				1		FRIL1_MOUSE	S86			1			JAM1_MOUSE	S288				1		MAP1B_MOUSE	S1781				1		NEDD4_MOUSE	T287				1		PARF_MOUSE
ARHG7_MOUSE	S497		1	1	1		CEP55_MOUSE	S423				1		DKC1_MOUSE	S455				1		FXL20_MOUSE	S421		1	1			JIP4_MOUSE	S730			1	1		MAP1B_MOUSE	S1789				1		NEIL3_MOUSE	S34	1					PARF_MOUSE
ARHGF_MOUSE	S107				1		CEP55_MOUSE	S428				1		DKC1_MOUSE	S481	1			1		FXL20_MOUSE	T417		1	1			JIP4_MOUSE	S733			1	1		MAP1B_MOUSE	S1793				1		NEIL3_MOUSE	S41	1					PAXI_MOUSE
ARHGF_MOUSE	S109				1		CGNL1_MOUSE	S199				1		DLGP5_MOUSE	S328				1		FXR2_MOUSE	S602	1			1		K1191_MOUSE	S183	1					MAP1B_MOUSE	S828				1		NEIL3_MOUSE	S45	1					PBIP1_MOUSE
ARHGF_MOUSE	S116				1		CGNL1_MOUSE	S203				1		DMD_MOUSE	T2605	1					FXR2_MOUSE	S604	1			1		K1462_MOUSE	S486				1		MAP1B_MOUSE	S829				1		NEIL3_MOUSE	T30	1					PCM1_MOUSE
ARHGF_MOUSE	S33				1		CGNL1_MOUSE	S252	1			1		DNJA2_MOUSE	S394				1		FYB_MOUSE	S561			1			K1462_MOUSE	S954				1		MAP1B_MOUSE	S934				1		NEST_MOUSE	S1010	1			1		PCM1_MOUSE
ARHGF_MOUSE	S42				1		CGNL1_MOUSE	S257				1		DNJA2_MOUSE	S395				1		FYV1_MOUSE	S307	1					K1462_MOUSE	T484				1		MAP1B_MOUSE	Y1332				1		NEST_MOUSE	S1216				1		PCX1_MOUSE
ARM10_MOUSE	S43	1	1	1	1		CGNL1_MOUSE	S284	1			1		DNJC2_MOUSE	S47				1		G3BP1_MOUSE	S149	1					K1671_MOUSE	S205	1			1		MAP1B_MOUSE	Y1792				1		NEST_MOUSE	S1562				1		PCX1_MOUSE
ASAP2_MOUSE	S704				1		CGNL1_MOUSE	S602				1		DNJC2_MOUSE	S49				1		G3BP1_MOUSE	S231	1	1		1		K1C16_MOUSE	S319	1					MAP1S_MOUSE	S658				1		NEST_MOUSE	S1565	1			1		PCX1_MOUSE
ASC_MOUSE	S193		1				CHD8_RAT	S??				1		DNJC2_MOUSE	S60				1		GBF1_CRIGR	S??			1	1		K2C8_MOUSE	S24	1					MAP1S_MOUSE	T659				1		NEST_MOUSE	S169	1					PCX1_MOUSE
ASHWN_MOUSE	S189				1		CHD8_RAT	T??				1		DNJC2_MOUSE	S63				1		GBG12_MOUSE	S26		1				KAP0_MESAU	S??	1			1		MAP2_MOUSE	S1654	1					NEST_MOUSE	S1837				1		PCX1_MOUSE
ASHWN_MOUSE	S193				1		CHERP_MOUSE	S822				1		DNJC5_MOUSE	S10	1	1	1	1		GCF_MOUSE	S85				1		KAP2_MOUSE	S96	1	1	1			MAP2_MOUSE	S1783	1					NEST_MOUSE	S1860				1		PCX1_MOUSE
												Figure 1														Figure 1 (continued)														Figure 1 (continued)
[truncated: 47 more columns]
